# Supplementary material for: New Polyprenylated Phloroglucinol and Other Compounds Isolated from the Fruits of Clusia nemorosa (Clusiaceae)
Source: MDPI journal article supplement (doi:10.3390/molecules200814326), 2015-08-06
Supplement: s1 [file s1]

# Supplementary Materials

AMOSTRA: FCN 3 (PROTON) - 500MHZ  
SOLVENTE: CDCL3  
OPERADOR DO NMR - MAURICIO

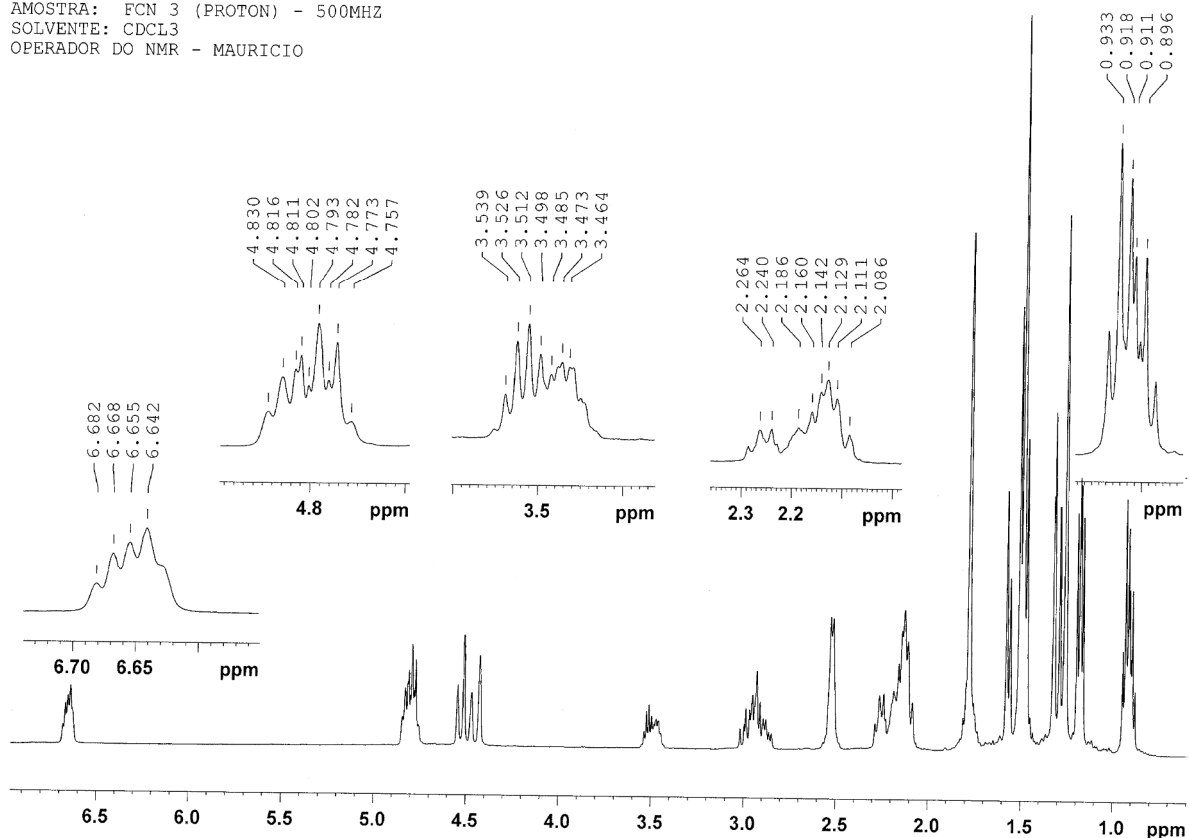

**Figure S1.**  $^1\text{H}$ -NMR spectrum of compound **1** at 500 MHz in  $\text{CDCl}_3$ .

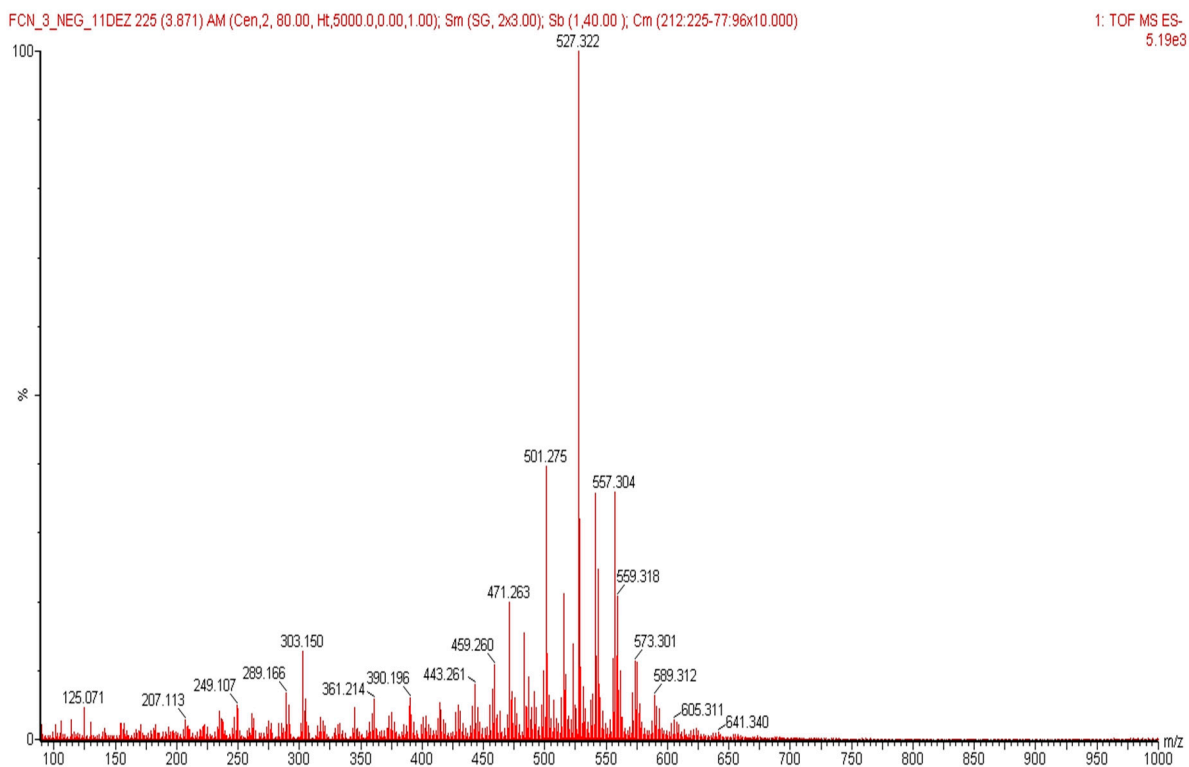

**Figure S2.** TOF-ESI-MS spectrum of compound **1**.
